# Supplementary material for: Delayed but Durable Remission to Rituximab in PLA2R-Associated Membranous Nephropathy Despite B-Cell Reconstitution: A Case Report
Source: Research Square preprint supplement (doi:10.21203/rs.3.rs-8533075/v1), 2026-01-19
Supplement: Supplementary file 1 [file 7447e4201b8aa378ee663efc.xlsx]

## Sheet: Sheet1
	第一次	ALB	尿蛋白	血肌酐	CD19	PLA2R	第二次	ALB	尿蛋白	血肌酐	CD19	PLA2R		第三次	ALB	尿蛋白	血肌酐	CD19	PLA2R	特殊情况	第四次	ALB	尿蛋白	血肌酐	CD19	PLA2R	特殊情况
	2022.1.27	19.5	10.92	107	650	26.13	2022.2.4	20.8	5.8	118	5			2022.2.13	26.7	9.94	141	0		前列腺炎	2022.2.28	30.4	15.21	127	1		前列腺炎
	2个月	ALB	尿蛋白	血肌酐	CD19	PLA2R	3个月	ALB	尿蛋白	血肌酐	CD19	PLA2R		4个月	ALB	尿蛋白	血肌酐	CD19	PLA2R		5个月	ALB	尿蛋白	血肌酐	CD19	PLA2R	第五次
	2022.3.28	28	10.08	119	1		2022.4.26	29.5	11.75	137	1			2022.5.24	32.4	13.47	179	12	25.64		2022.6.28	26	14.03	200	31	36.84	500mg	7.2
	6个月	ALB	尿蛋白	血肌酐	CD19	PLA2R	7个月	ALB	尿蛋白	血肌酐	CD19	PLA2R		8个月	ALB	尿蛋白	血肌酐	CD19	PLA2R		9个月	ALB	尿蛋白	血肌酐	CD19	PLA2R	第六次
	2022.8.3	26.6	15.28	203	3	10.62	2022.9.6	28.3	11.32	197	3	<5		2022.10.29	27.3	13.85	193	36.39	24.93		11.08						500mg	11.7
	10个月	ALB	尿蛋白	血肌酐	CD19	PLA2R	11个月	ALB	尿蛋白	血肌酐	CD19	PLA2R		12个月	ALB	尿蛋白	血肌酐	CD19	PLA2R		13个月	ALB	尿蛋白	血肌酐	CD19	PLA2R	第七次
	12.27	31.4	13.67	191	1.03	6.84	2023.01							2023.02							2023.03.05	32	9.17	166	26	<5	500mg	3.28
	10个月	ALB	尿蛋白	血肌酐	CD19	PLA2R	11个月	ALB	尿蛋白	血肌酐	CD19	PLA2R		16个月	ALB	尿蛋白	血肌酐	CD19	PLA2R		18个月	ALB	尿蛋白	血肌酐	CD19	PLA2R
													10mgtid	2023.6.6	36	10.62	174	2.11	<5		2023.8.15	40.8	2.68	169	29.56	<5
	21个月	ALB	尿蛋白	血肌酐	CD19	PLA2R	24个月	ALB	尿蛋白	血肌酐	CD19	PLA2R		加用雷公藤	ALB	尿蛋白	血肌酐	CD19	PLA2R		停用雷公藤	ALB	尿蛋白	血肌酐	CD19	PLA2R
	2023.11.21	42.3	3.85	161	65.48	<5	2024.3.12	41.9	2.03	139	101.35	<5		2024.3.26			153				2024.4.9			151
	27个月	ALB	尿蛋白	血肌酐	CD19	PLA2R	30个月	ALB	尿蛋白	血肌酐	CD19	PLA2R	ACR	33个月	ALB	尿蛋白	血肌酐	CD19	PLA2R	ACR	39个月	ALB	尿蛋白	血肌酐	CD19	PLA2R	ACR
	2024.6.25	46.2	1.76	126	119.86	<5	2024.10.8	46.4	1.06	126		<1	1469.7	2024.12.24	47.9	1.18	119		<5	474.82	2025.4.29	44.3		122			175.79
	39个月	ALB	尿蛋白	血肌酐	CD19	PLA2R
	2025.9.16
			2022.1.27	2022.2.4	2022.2.13	2022.2.28	2022.3.28	2022.4.26	2022.5.24	2022.6.28	2022.8.3	2022.9.6	2022.10.29	2022.12.27	2023.03.05	2023.6.6	2023.8.15	2023.11.21	2024.3.12	2024.3.26	2024.4.9	2024.6.25	2024.10.8	2024.12.24	2025.4.29	2025.9.16
		ALB	19.5	20.8	26.7	30.4	28	29.5	32.4	26	26.6	28.3	27.3	31.4	32	36	40.8	42.3	41.9			46.2	46.4	47.9	44.3	46.5
		尿蛋白	10.92	10.8	9.94	15.21	10.08	11.75	13.47	14.03	15.28	11.32	13.85	13.67	9.17	10.62	2.68	3.85	2.03			1.76	1.06	1.18
		血肌酐	107	118	141	127	119	137	179	200	203	197	193	191	166	174	169	161	139	153	151	126	126	119	122	128
		CD19	650	5	0	1	1	1	12	31	3	3	36.39	1.03	26	2.11	29.56	65.48	101.35			119.86
		PLA2R	26.13						25.93	36.8	10.62	<5	24.93	6.84	<5	<5	<5	<5	<5			<5	<1	<1	<1	<1
		ACR																						474.82	175.79	287.34
		PLA2R
		CD19	650	5	0	1	1	1	12	31	3	3	36.39	1.03	26
		PLA2R	26.13						25.93	36.8	10.62	<5	24.93	6.84	<5

## Sheet: Sheet2
date	Alb	UP	Cr	CD19	PLA2R	ACR
2022-01-27	19.5	10.92	107	650	26.13
2022-02-04	20.8	5.8	118	5
2022-02-13	26.7	9.94	141	0
2022-02-28	30.4	15.21	127	1
2022-03-28	28	10.08	119	1
2022-04-26	29.5	11.75	137	1
2022-05-24	32.4	13.47	179	12	25.64
2022-06-28	26	14.03	200	31	36.84
2022-08-03	26.6	15.28	203	3	10.62
2022-09-06	28.3	11.32	197	3	5
2022-10-29	27.3	13.85	193	36.39	24.93
2022-12-27	31.4	13.67	191	1.03	6.84
2023-03-05	32	9.17	166	26	5
2023-06-06	36	10.62	174	2.11	5
2023-08-15	40.8	2.68	169	29.56	5
2023-11-21	42.3	3.85	161	65.48	5
2024-03-12	41.9	2.03	139	101.35	5
2024-06-25	46.2	1.76	126	119.86	5
2024-10-08	46.4	1.06	126		1
2024-12-24	47.9	1.18	119		1	474.82
2025-04-29	44.3		122		1	175.79
2025-09-16	46.5		128		1	287.34
					1
